# Supplementary material for: Facile Fabrication of a Highly Sensitive and Robust Flexible Pressure Sensor with Batten Microstructures
Source: MDPI journal article supplement (doi:10.3390/mi13081164), 2022-07-23
Supplement: s1 [file s1]

### Supplementary information

Table S1. Dimensions of the models.

| Model   | Line width of batten ( $\mu\text{m}$ ) | Spacing of batten ( $\mu\text{m}$ ) | Height of batten ( $\mu\text{m}$ ) |
|---------|----------------------------------------|-------------------------------------|------------------------------------|
| model-A | 250                                    | 250                                 | 70                                 |
| model-B | 200                                    | 130                                 | 70                                 |
| model-C | 300                                    | 200                                 | 70                                 |
| model-D | 200                                    | 130                                 | 35                                 |
| model-E | 300                                    | 200                                 | 35                                 |
| model-F | 200                                    | 100                                 | 35                                 |
| model-G | 500                                    | 500                                 | 35                                 |
| model-P | -                                      | -                                   | -                                  |

Table S2. Compositions of MCNFs.

| Sample name                | PU (g) | MWCNTs (g) |
|----------------------------|--------|------------|
| MWCNT <sub>0.022</sub> /PU | 0.9    | 0.02       |
| MWCNT <sub>0.032</sub> /PU | 0.9    | 0.03       |
| MWCNT <sub>0.042</sub> /PU | 0.9    | 0.04       |
| MWCNT <sub>0.052</sub> /PU | 0.9    | 0.05       |

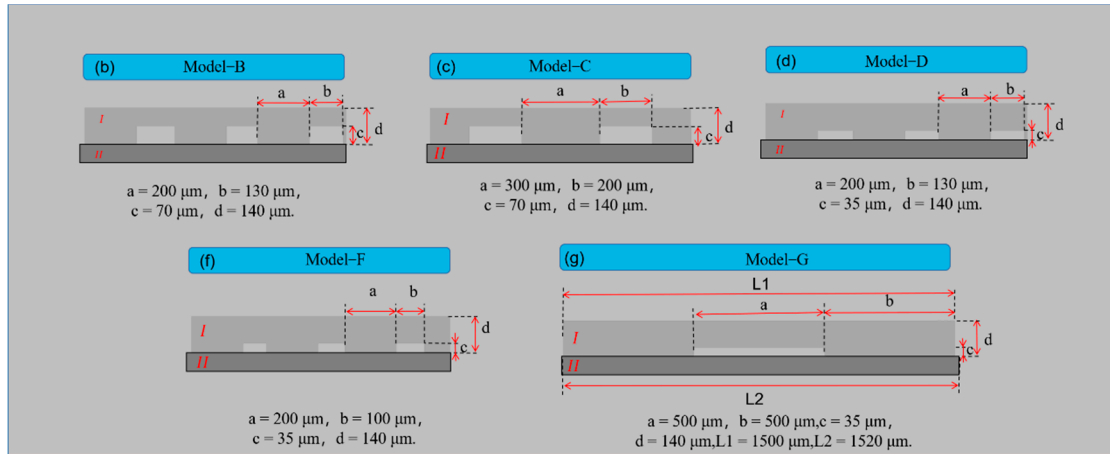

Figure S1. Schematic diagrams of the MCNF in contact with the electrode (Model-B, Model-C, Model-D, Model-F, and Model-G).

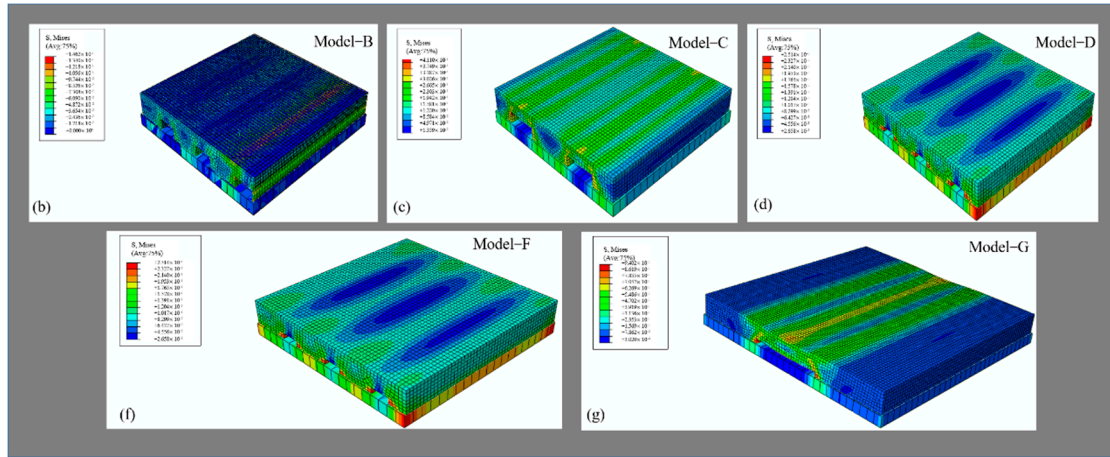

Figure S2. Stress distributions of MCNFs in contact with electrodes of different models (Model-B, -C, -D, -F, and -G).

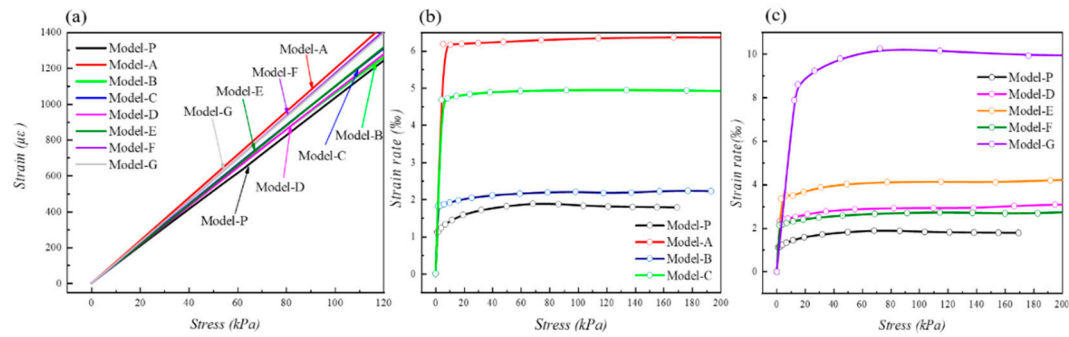

Figure S3. FEM analysis results of MCNFs. (a) Stress–micro-strain curves of finite element Model-P and Model-A through Model-G; (b) Stress–strain rate curves of finite element Model-P and Model-A through Model-C; (c) Stress–strain rate curves of finite element Model-P and Model-D through Model-G.
